# Supplementary material
Source: publisher site journal article supplement (https://www.dovepress.com/article/595563)
Supplement: Supplementary file 1 [file 595563%20Supplementary%20Material.docx]

**Supplement appendix**

Supplement S1. Medical Coding Definitions: Abbreviations, ICD-9-CM, ICD-10-CM, and National Health Insurance (NHI) Codes

Supplement S2. Summary of Follow-up Duration and Time to Mortality

Supplement S3. Sensitivity Analysis of Mortality Outcomes by Follow-up Duration

Supplement S4. Adjusted Hazard Ratios for Mortality (Lipo-Dox vs. Epirubicin) by Lipo-Dox Cumulative Defined Daily Dose (cDDD) Subgroups

Supplement S5. Sensitivity Analysis: Matched vs. Unmatched Cohort Overall Survival

Supplement S6. Kaplan-Meier Curves for Cardiotoxicity-Free Survival and Disease-Free Survival

**Supplement S1. Medical Coding Definitions: Abbreviations, ICD-9-CM, ICD-10-CM, and National Health Insurance (NHI) Codes**

|  | **Abbreviation** | **ICD-9-CM / ICD-10-CM / NHI code** |
| --- | --- | --- |
| **Study population:** |  |  |
| Female breast cancer |  | 174 / C50 |
| Adjuvant chemotherapy |  | P15xx0 - P15xx2 (xx = 11 - 30), P15xx3 - P15xx5 (xx = 37 - 47); Liposome, Cyclophosphamide, Epirubicin |
| Radiotherapy |  | 36001B - 36021C, 37047B |
| Mastectomy |  | 63001B - 63004B, 63005C, 63006C, 63007B, 63008B, 63009C - 63011C, 63012B - 63016B |
| **Events:** Mortality |  | 000 - 999, E800 - E899 / A00 - Z99 |
| **Side effects:** |  |  |
| Cardiotoxicity |  | Any of below |
| Acute myocardial infarction | AMI | 410 / I21 - I24, I52 |
| Acute and subacute forms of ischemic heart disease | Acute IHD | 411 / I20, I24 |
| Angina pectoris | Angina | 413 / I20 |
| Chronic ischemic heart disease | Chronic IHD | 414 / I25 |
| Acute myocarditis |  | 422 / I40, I41 |
| Cardiomyopathy |  | 425 / I42, I43, I52 |
| Conduction disorders |  | 426 / I44, I45 |
| Heart failure | CHF | 428 / I50 |
| Ill-defined descriptions and complications |  | 429 / I25, I51, I52 |
| Breast cancer recurrence |  | 174 / C50 |
| **Exclusion:** |  |  |
| Metastasis |  |  |
| Melanoma |  | 172 / C43 |
| Malignancy |  | 140 - 209 /C00 - D48 |
| Cervical carcinoma in situ |  | 233.1/ D06 |
| **Comorbidities:** |  |  |
| Diabetes mellitus | DM | 250 / E10 - E14 |
| Hypertension | HTN | 401 - 405 / I10 - I15 |
| Depression |  | 296.2, 296.3, 296.82, 300.4, 311 / F32, F33, F53 |
| Chronic kidney disease | CKD | 585 / N18 |
| Congestive heart failure | CHF | 428 / I50 |
| Chronic obstructive pulmonary disease | COPD | 490 - 496 / J40 - J47 |
| Hyperlipidemia |  | 272 / E78 |

**Supplement S2. Summary of Follow-up Duration and Time to Mortality**

| **Years of follow-up** | | | | |
| --- | --- | --- | --- | --- |
| **Cohort** | **Min** | **Median** | **Max** | **Mean ± SD** |
| Lipo-Dox | 1.01 | 6.07 | 10.16 | 6.13 ± 3.04 |
| Epirubicin | 1.03 | 6.02 | 10.24 | 6.10 ± 2.98 |
| Total | 1.01 | 6.05 | 10.16 | 6.12 ± 3.01 |
|  |  |  |  |  |
|  |  |  |  |  |
| **Overall survival time among decedents** | | | | |
| **Cohort** | **Min** | **Median** | **Max** | **Mean±SD** |
| Lipo-Dox | 1.54 | 5.49 | 10.08 | 5.77 ± 3.26 |
| Epirubicin | 1.43 | 5.33 | 10.10 | 5.42 ± 3.17 |
| Total | 1.43 | 5.47 | 10.10 | 5.60 ± 3.22 |

Descriptive statistics of follow-up duration and time to mortality among patients in the study and comparison cohorts. Values are presented as minimum, median, maximum, and mean ± standard deviation (SD).

**Supplement S3. Sensitivity Analysis of Mortality Outcomes by Follow-up Duration**

| **Mortality Endpoint** | **Adjusted Hazard Ratio (aHR)**  **(Lipo-dox vs. Epirubicin)** | **95% Confidence Interval (95% CI)** | **P value** |
| --- | --- | --- | --- |
| 3-year Mortality | 0.816 | 0.724 – 0.937 | 0.018 |
| 5-year Mortality | 0.779 | 0.672 – 0.913 | 0.007 |
| All-time Mortality | 0.754 | 0.632 – 0.899 | <0.001 |

aHR, Adjusted Hazard Ratio; CI, Confidence Interval.

Adjusted variables included: Age (per year increase); Stage (I [Reference], II, III); Insurance Premium (NT$) (<18,000 [Reference], 18,000–34,999, ≥35,000); Comorbidities (presence vs. absence: Diabetes Mellitus (DM), Hypertension (HTN), Depression, Chronic Kidney Disease (CKD), Congestive Heart Failure (CHF), Chronic Obstructive Pulmonary Disease (COPD), Hyperlipidemia); and Level of Care (Local hospital [Reference], Regional hospital, Hospital center).

**Supplement S4. Adjusted Hazard Ratios for Mortality (Lipo-Dox vs. Epirubicin by Lipo-Dox Cumulative Defined Daily Dose (cDDD) Subgroups**

| **Outcome and side effects** | **Cohort** | **aHR** | **95% CI** | **95% CI** | ***P*** |
| --- | --- | --- | --- | --- | --- |
| **Mortality** | Overall (N=525) | 0.754 | 0.632 | 0.899 | < 0.001 |
|  | < 33 cDDD (N=131) | 0.863 | 0.725 | 1.029 | 0.184 |
|  | 33 - 66 cDDD (N=225) | 0.816 | 0.684 | 0.973 | < 0.001 |
|  | ≧ 67 cDDD (N=169) | 0.586 | 0.490 | 0.698 | < 0.001 |

aHR, Adjusted Hazard Ratio; CI, Confidence Interval; cDDD, cumulative Defined Daily Dose.
cDDD refers to the cumulative Defined Daily Dose of Lipo-Dox.

Adjusted variables included: Age (per year increase); Stage (I [Reference], II, III); Insurance Premium (NT$) (<18,000 [Reference], 18,000–34,999, ≥35,000); Comorbidities (presence vs. absence: Diabetes Mellitus (DM), Hypertension (HTN), Depression, Chronic Kidney Disease (CKD), Congestive Heart Failure (CHF), Chronic Obstructive Pulmonary Disease (COPD), Hyperlipidemia); and Level of Care (Local hospital [Reference], Regional hospital, Hospital center).

**Supplement S5. Sensitivity Analysis: Matched vs. Unmatched Cohort Overall Survival**

| **Analysis** | **Cohort** | **N** | **Events** | **Person-Years** | **Rate (per 105 PYs)** | **aHR (95% CI)** | **P value** |
| --- | --- | --- | --- | --- | --- | --- | --- |
| Matched | Epirubicin | 525 | 45 | 323,253.79 | 13.92 | Reference |  |
| Matched | Lipo-Dox | 525 | 28 | 271,826.35 | 10.30 | 0.754 (0.632-0.899) | <0.001 |
| Unmatched | Epirubicin | 926 | 77 | 570,149.24 | 13.51 | Reference |  |
| Unmatched | Lipo-Dox | 525 | 28 | 271,826.35 | 10.30 | 0.775 (0.645-0.906) | 0.003 |

aHR, Adjusted Hazard Ratio; CI, Confidence Interval; PYs, Person-Years. Adjusted variables included: Age, Stage, Insurance Premium, Comorbidities, and Level of Care.

**Supplement S6. Kaplan-Meier Curves for Cardiotoxicity-Free Survival and Disease-Free Survival**

Kaplan-Meier survival curves for (a) cardiotoxicity-free survival and (b) disease-free survival comparing the Lipo-Dox and Epirubicin groups in the matched cohort (n = 1,050). Neither endpoint showed a statistically significant difference between groups (log-rank P > 0.05). See attached figure files.
